# Supplementary material for: Undernutrition Scored Using the CONUT Score with Hypoglycemic Status in ICU-Admitted Elderly Patients with Sepsis Shows Increased ICU Mortality
Source: Diagnostics (Basel). 2023 Feb 17;13(4):762. doi: 10.3390/diagnostics13040762 (PMC9955230; doi:10.3390/diagnostics13040762)
Supplement: Supplementary file 1 [file diagnostics-13-00762-s001.zip]

Archive with 4 entries (4 files):
- TableS1_230206JY.pdf
- TableS2-230206JY.pdf
- TableS3-230206JY.pdf
- TableS4-230206JY.pdf
