# Supplementary material for: Undernutrition Scored Using the CONUT Score with Hypoglycemic Status in ICU-Admitted Elderly Patients with Sepsis Shows Increased ICU Mortality
Source: Diagnostics (Basel). 2023 Feb 17;13(4):762. doi: 10.3390/diagnostics13040762 (PMC9955230; doi:10.3390/diagnostics13040762)
Supplement: Supplementary file 1 [file diagnostics-13-00762-s001.zip › TableS1_230206JY.pdf]

**Supplementary Table S1. Assessment of the undernutrition status using the CONUT score\***

| Parameter                 | Undernutrition Status |            |            |             |
|---------------------------|-----------------------|------------|------------|-------------|
|                           | Normal                | Light      | Moderate   | Severe      |
| Serum Albumin (g/dL)      | 3.5–4.5               | 3.0–3.49   | 2.5–2.9    | <2.5        |
| Alb Score                 | <b>0</b>              | <b>2</b>   | <b>4</b>   | <b>6</b>    |
| Total Lymphocytes/μL      | >1600                 | 1200–1599  | 800–1199   | <800        |
| TLC Score                 | <b>0</b>              | <b>1</b>   | <b>2</b>   | <b>3</b>    |
| Total Cholesterol (mg/dL) | >180                  | 140–180    | 100–139    | <100        |
| T-cho Score               | 0                     | 1          | 2          | 3           |
| Screening Total Score     | <b>0–1</b>            | <b>2–4</b> | <b>5–8</b> | <b>9–12</b> |

\* The CONUT score = (Alb Score) + (TLC Score) + (T-cho score)

**Abbreviations:** Alb, Serum Albumin; TLC, Total lymphocytes; T-cho, Total cholesterol
