# Supplementary material for: Undernutrition Scored Using the CONUT Score with Hypoglycemic Status in ICU-Admitted Elderly Patients with Sepsis Shows Increased ICU Mortality
Source: Diagnostics (Basel). 2023 Feb 17;13(4):762. doi: 10.3390/diagnostics13040762 (PMC9955230; doi:10.3390/diagnostics13040762)
Supplement: Supplementary file 1 [file diagnostics-13-00762-s001.zip › TableS2-230206JY.pdf]

**Supplementary Table S2. Origin of infection in each glycemic group**

| <b>Origin of infection</b>     | <b>Hypo-G (n = 46)</b> | <b>Inter-G (n = 183)</b> | <b>Hyper-G (n = 75)</b> |
|--------------------------------|------------------------|--------------------------|-------------------------|
| Lung (n = 135)                 | 13/46 (28.3%)          | 91/183 (49.7%)           | 31/75(41.3%)            |
| Urine tract (n = 64)           | 9/46 (19.6%)           | 40/183 (21.9%)           | 15/75 (20.0%)           |
| Abdomen (n = 46)               | 9/46 (19.6%)           | 22/183 (12.0%)           | 15/75 (20.0%)           |
| Soft tissue (n = 20)           | 7/46 (15.2%)           | 10/183 (5.5%)            | 2/75 (2.7%)             |
| Central Nervous System (n = 6) | 0/46 (0%)              | 4/183 (2.2%)             | 2/75 (2.7%)             |
| Endocardial systems (n = 3)    | 0/46 (0%)              | 2/183 (1.1%)             | 1/75 (1.3%)             |
| Others (n = 33)                | 8/46(17.4%)            | 14/183 (7.7%)            | 9/75 (12.0%)            |

**Abbreviations:** Hypo-G, Hypoglycemia group (blood glucose level <80 mg/dL); Hyper-G, hyperglycemia group (blood glucose level  $\geq 200$  mg/dL); Inter-G, intermediate glycemia group (blood glucose level = 80–119 mg/dL); Others, including cases of unknown origin
