# Supplementary material for: Undernutrition Scored Using the CONUT Score with Hypoglycemic Status in ICU-Admitted Elderly Patients with Sepsis Shows Increased ICU Mortality
Source: Diagnostics (Basel). 2023 Feb 17;13(4):762. doi: 10.3390/diagnostics13040762 (PMC9955230; doi:10.3390/diagnostics13040762)
Supplement: Supplementary file 1 [file diagnostics-13-00762-s001.zip › TableS3-230206JY.pdf]

**Supplementary Table S3. Comparison of causative pathogens among groups (n=307)**

| <b>Causative pathogen</b>     | <b>All</b> | <b>Survivors</b> | <b>Non-survivors</b> | <b>P-value *</b> |
|-------------------------------|------------|------------------|----------------------|------------------|
| <b>Gram-negative bacteria</b> | 118        | 95/118           | 23/118               | 0.724            |
| <b>Gram-positive bacteria</b> | 87         | 67/87            | 20/87                | 0.501            |
| <b>Fungi</b>                  | 7          | 5/7              | 2/7                  | 0.594            |
| <b>None</b>                   | 46         | 38/46            | 8/46                 | 0.569            |
| <b>Non-specific</b>           | 29         | 39/49            | 10/49                | 0.983            |

**Abbreviations:** None, No bacteria were detected in the culture; Non-specific, Normal flora or multiple bacteria were detected but no causative pathogenic bacteria were identified.

\*Chi-square tests were performed for analysis between survivors and non-survivors.
