# Supplementary material for: Undernutrition Scored Using the CONUT Score with Hypoglycemic Status in ICU-Admitted Elderly Patients with Sepsis Shows Increased ICU Mortality
Source: Diagnostics (Basel). 2023 Feb 17;13(4):762. doi: 10.3390/diagnostics13040762 (PMC9955230; doi:10.3390/diagnostics13040762)
Supplement: Supplementary file 1 [file diagnostics-13-00762-s001.zip › TableS4-230206JY.pdf]

**Supplementary Table S4. Comparisons by causative pathogens (n=307)**

| <b>Causative pathogen</b>        | <b>Gram-negative bacteria (n=118)</b> | <b>Gram-positive bacteria (n=87)</b> | <b>Fungi (n=7)</b> | <b>None (n=46)</b> | <b>Non-specific (n=29)</b> | <b>P-value*</b> |
|----------------------------------|---------------------------------------|--------------------------------------|--------------------|--------------------|----------------------------|-----------------|
| <b>CONUT score**</b>             | 7.18 ± 3.03                           | 7.54 ± 3.28                          | 6.17 ± 2.23        | 5.41 ± 3.35        | 6.45 ± 3.17                | 0.029           |
| <b>BG (mg/ml)</b>                | 169.8 ± 168.2                         | 159.4 ± 128.1                        | 167.9 ± 56.5       | 212.5 ± 247        | 184.2 ± 79.4               | 0.245           |
| <b>Ratio of septic shock (%)</b> | 63/117                                | 43/84                                | 2/7                | 15/45              | 29/48                      | 0.059           |
| <b>Ratio of Hypo-G (%)</b>       | 23/116                                | 15/86                                | 0/7                | 6/46               | 2/49                       | 0.078           |
| <b>Ratio of Inter-G (%)</b>      | 69/116                                | 53/86                                | 5/7                | 26/46              | 30/49                      | 0.945           |
| <b>Ratio of Hyper-G (%)</b>      | 24/116                                | 18/86                                | 2/7                | 14/46              | 17/49                      | 0.271           |
| <b>SOFA score</b>                | 8.61 ± 3.57                           | 8.03 ± 2.94                          | 6.71 ± 2.99        | 7.54 ± 3.25        | 7.73 ± 2.99                | 0.844           |

**Abbreviations:** CONUT score, Controlling Nutritional Status score; BG, Blood Glucose; Ratio of septic shock, Ratio of septic shock/ Total number of patients; Hypo-G, Hypoglycemia group (blood glucose level <80 mg/dL); Hyper-G, hyperglycemia group (blood glucose level  $\geq$  200 mg/dL); Inter-G, intermediate glycemia group (blood glucose level = 80–119 mg/dL); None, No bacteria were detected in the culture. Non-specific, Normal flora or multiple bacteria were detected but no causative pathogenic bacteria were identified.

SOFA score obtained at admission (mean $\pm$ SD)

\*Kruskal-Wallis test was conducted for multiple comparisons among CONUT scores, BG, and SOFA scores, and the origin of infection.

\*\*Chi-square tests were performed to analyze the ratio of septic shock in each of the three glycemic groups (Hypo-G, Inter-G, Hyper-G). We determined the optimal cut-off and the significance level was 5%.

\*\*Bonferroni test was conducted
